# Supplementary material for: Molecular Evolution of Glycoside Hydrolase Genes in the Western Corn Rootworm (Diabrotica virgifera virgifera)
Source: PubMed Central journal article supplement (PMC3981738; doi:10.1371/journal.pone.0094052), 2014-04-09
Supplement: pone.0094052.s003.pdf [file pone.0094052.s003.pdf]

**A**

**GH16-1** M--ILILFAFSAILFNGVHS---VCLKNSITTASGLHAPKNKSLCSGQLIFEDNFNFDLTSK-WHHEQTLGGG-GNNEFEWYTD DRRNSYTSNGQLHIKP  
**GH16-2** M----NLMKFMALIFHNLRG-----CEKSVTTVSGTHAPL--LPCKGDLIKFDEFNNLDLKK-WQHEVSLSGN-GNWEFQWYTNNSNSYVENGVLHIRP  
**GH16-3** M---IVICLIVALLVQNIHG-----CGIPLTTVSGSHAPK--AVCSGDLIKFDDNFNLDLTK-WQHEQTLGGG-GNWEFQWYTNNSNSYVENGVLHIRP  
**GH16-4** MDRRVLVVLTVIVLLQNVHT-----CKKSITTVSGNYAPK--EVCSGKIIIFEDNFDELNLK-WNHEQTLGGG-GNWEFQWYTNDRNSYVKDGLHIRP  
**GH16-5** MFKLIVITVLISIFYPTVYSQSRICQKPSITTASGTAAPTG-TICPGDLIFEENFNGPPTFKRWEHERTLGGGASNNQFQLYHNNRNSNSFVRDGNLHICP  
**GH16-6** MFKLILHTILISIFYPTVYQGLGTCQRPSVTTASGIAAPTG-TIFPGDLIFEDNFDPGPTFTKWWTHESLSSGGANNQFQWYQNNRNSNSFVRDGNLHIRP  
**GH16-7** -----  
**GH16-8** -----GNNEFEWYTNNSNSYTSNGILHIKP  
**GH16-9** -----TLTGG-GNFEFEWYTD DRRNSYAENGLHIKP

**GH16-1** TFVADEY-GEKFLYSGTIDL-----GAKCTGSDNEGCRRTGSANAI VNP IKSARMRLDSFSFKYGRVEVSAKVPSPGDWLWPAIWMLPSKWV-YGSWPAS  
**GH16-2** TLVADDY-GNEFLYSGTIDVNGGSPADECTNPQFYGCSRTGSATNIVNPIKSARIRSLNSFSFKYKVEVRAKVPAGDWLWPAIWLLPRYNQ-YSTWPAS  
**GH16-3** TLVADDY-GNEFLYSGTIDVNGGSPADECTNPQFYGCSRTGSATNIVNPIKSARIRSLNSFSFKYKVEVRAKVPAGDWLWPAIWLLPRYNQ-YSTWPAS  
**GH16-4** TLLADQY-GNDFLYSGTIDL-----GKECTNSEWFGCRRVGTKTQILNPIKSARLRTANSFSFKYKVEIRAKIPAGDWLWPAIWLLPTYWK-YGWPTS  
**GH16-5** TLLADDN-GEAFLYNGTISLNGPYPIEHCTISGYDGLCRTGNSIIILNPIKSARIHTAFSFSFKYGRVEARVKVPLGDWLWPAIWLMPKPRNNE-YSSWPSS  
**GH16-6** TLLANDT-GEAFLYNGTIDLNGAFPIGYCSIPVYDGLCRTGNSIIILNPIKSARIHSAYSFSFKYGRVVARVKVPLGDWLWPAIWLMEPRDNE-YSSWPSS  
**GH16-7** -----  
**GH16-8** TFVADEL-GEQFLQSATVDL-----GNKCTNPHNSGCKRTGSPGEILNPVKSARLRTLDTSFIFYGKVEVRAKVPAGDWLWPAIWLLPNKWIENGDWISS  
**GH16-9** TFVADEHGGDGLYSGTIDL-----GKKCTNNDNEGCKRTGSANAIILNPVKSARIRLNSFSFKYKVEISAKNPSPGDWLWPAIWLLPSKWV-YGWPRS

**GH16-1** GEIDIMESRGNRQYY-DPSGQNVGTQLEASTLHWGPNPKFNKFMKTHWEKKNWNGGDWNAHYHQVEWTPPEHIKFSRDDQELGTITPPSGGFQYGDG  
**GH16-2** GEIDIMESRGNRQLT-NPSGVNIGVQIGSTLHWGPNPNYQYARTHFE-ENLETGYDKAFHNYQVEWTPDYIKFAIDDEEIGRVTPPGGGFELGELSS  
**GH16-3** GEIDIMESRGNRQLT-NPSGVNIGVQIGSTLHWGPNPNYQYARTHFE-ENLETGYDKAFHNYQVEWTPDYIKFAIDDEEIGRVTPPGGGFELGELSS  
**GH16-4** GEIDIMESRGNRQLI-SQSGRKGIVQTIQYTLNWGPNPDNLFYKTHFD-SFLDVGYNQEFHFKYQLEWTPDYIKFSLDDKEVGTI VPPSGGFQDLADLTS  
**GH16-5** GEIDILESMGNKGYI-K-NGVNIGVEVGSSTLHWGPNPYSALNRYPLTHYT-LNNADGWNADPHIYEMIWNTTSITFLIDHVVLGVSVPDGGFELGNF-S  
**GH16-6** GEIDILETRGNKNYI-K-NGLNIGVQVGSSTLHWGPI-----  
**GH16-7** -----KELI-KPNGQNIPTLLNNTLHWGANAQTNRYAQTHYE-TTIEGFDQAYHKYQLEWTPDYIKFSLDDREIGKVT PPSGGFELGNLEK  
**GH16-8** GEIDIMETRGNKELI-KPNGQNIPTLLSTLHWGANAQTNRYAQTHYE-TTIEGFDQAYHKYQVEWTPDYIKFSLDDREIGRVTPPSGGFELGNFEH  
**GH16-9** GEIDIMESRGNRELIAGSGQNIADLVA STLHWGPDAKNNKFMKTHWE-KTVTGGYDKAYHKYQVEWTPDHLKFSIDDEIGVT PPSGGFELGNFEH

**GH16-1** SGLPNPWSRGRMAPFDQEFHLLINLAVGG-AYFNDEFNNAKYPKPTSTEPYRQGMKTFWQANQKWKPTWNLNSDDSHLKVYDVRVWAL  
**GH16-2** SGLDNPWKRNSKMAPFDQEFYIVINLAVGGVNYFPDNANNSPRGKPSNTSPN--AATNFWEGREQLWPTWNI GTE DSHLQVDYVVKVWAI  
**GH16-3** SGLDNPWKRNSKMAPFDQEFYIVINLAVGGVNYFPDNANNSPRGKPSNTSPN--AATNFWEGREQLWPTWNI GTE DSHLQVDYVVKVWAI  
**GH16-4** TGLQNPWKNGTKMAPFDQEFHLLINLAVGGVSYFPDNANVTGKPKPTWNTSPY--APATFNARNEWLPWKMETDESHLKI DYVVKVWAL  
**GH16-5** TNTANPWAAGTKMAPFDQEFYIINLAVGTSWFSYGVNDGYPKPWKNSDG-RASMTKFWKAKDLWLP TWMNTTDDSHFQIDYIRVYAL  
**GH16-6** -----  
**GH16-7** TRLPNPWRGSSKMAPFDAEFYLINLAVGG-YFFPDQADNRSGKPKWSRTSPYRIGMTDFWRN-----  
**GH16-8** TGLPNPWRGSKMAPFDAEFHLLINLAVGG-NFFPDEADNRSGRKPWSHNVPYRIGMTDFWRNRQOWIPTWNLGTD DSHLKVYDVRVWAI  
**GH16-9** SQQQNLWKDGSKMAPFDAEFHLLINLAVGG-NFFPDVDNKSGKPKPTSTEPYRQGM-----

**B**

|                            |                                                                                 |
|----------------------------|---------------------------------------------------------------------------------|
| <b>Dvir GNBP-1</b>         | KLPGDWIYPEIYLTP-ANEK--YGL-KSQSGQIRIAFTPGNSDL-----NHLVHGLTIGRWSA                 |
| <b>Dvir GNBP-2</b>         | KLPGDWLYPILTINP-VKDE--YGP-GYDSGQITIAFCPGNAVL-----SHNVYGGIVISGSPV                |
| <b>Dvir GNBP-3</b>         | KLPGDWLYPILYLN- SAET--YGK-YYASGQRIAYTEGNTG-----ANHLKGGVILGDBEP                  |
| <b>Dpon AEE61901.1</b>     | KLPGDWLYPELYLNS-ESEE--YGS-GYESGQIRIAFAAGNEGE-----SRKLEGGVILGSIPA                |
| <b>Dpon ENN74344.1</b>     | KLPGDVIYYPEIYLQD-VANP-----ESLILIAFTRGNENY-----EKNGIDIGGQLYGGPYNISIKD            |
| <b>Dpon ENN74953.1</b>     | KLPGDWLYPELYLNS-ESEE--YGS-GYESGQIRIAFAAGNEGE-----NRKLEGGVILGSIPA                |
| <b>Tcas XP_972063.1</b>    | KLPGDWIYPQLFLNP-VSEE--YGS-DYASGQIRVAFPLPNQAM-----AQQLYGGCVLGPPTTA               |
| <b>Tcas NP_001164284.1</b> | KLPGDWIYPIYLEK-VSDP-----KDKIWIYSYARGNNQLLKK-----NKQDLGGNLLFGGLVIDPEEP           |
| <b>Tmol Q76DI2.1</b>       | KLPGDWIYPELYLNP-VNEE--YGP-GYASGQIRIAFSGGNEDL-----CDRLRGGCILGSRPA                |
| <b>Slit ACI32819.1</b>     | KLPYGSWLVEINLEP-LEHT--YGL-NYESGLMRVAFVRGNSYF-----AKKLYGGPVLGHSEP                |
| <b>Pxyl AFK24449.1</b>     | RMPRGDWLIPDILLEP-KENL--YGVNRNYSGLLSIASVRGNTAY-----SKTLKGGPILCDKEP               |
| <b>Amel NP_001157186.1</b> | KLPRGDWLFPLITLES-TDMC--TKN-SSIYCDIIVHSNGNSVLSMQ-----DGNDLSGSHLGGAHATDINS        |
| <b>Dmel GNBP1</b>          | KLPGDWIYVPLLLEP-LTEW--YQSGYESGQLRVALARGNSVLRMP-----RGKLV DGRSLYGGPVLSTDAH       |
| <b>Dmel GNBP2</b>          | KLPGDWLFPYLMQP--VST--YAE-THYAKQLRIAYARGNANLRTK-----QGDDISGNHLYGGGVVWHHGN        |
| <b>Dmel GNBP3</b>          | KMPRAQWVTPQIWLQP-RRPI--YGVDDYRSGQLRIAYTRPNGG-----NLDLYGAAVLFADEP                |
| <b>Spur XP_001176934.2</b> | KLPTGDWLWPAIWLLP-KHNG--YGE-WPASGEIDLVE SRGNAD-IKD-ADG--LSAGVDQMGSTMHGPFWPLNGY   |
| <b>Cint XP_002126690.1</b> | KMPDGDWIWPAWMLP-KTNS--YGS-WPASGEIDICE SRGNTD-LKD-DQG--VSHGNDAMGSTLHWGPYWPVNAY   |
| <b>Cgig BAG82629.1</b>     | KMPKGDWIWPAIWLLP-HRNA--YGG-WPASGEIDVVS SRGNTD-YHD-ENG--RSQGVDSFGSTLHFGPVYGYDPY  |
| <b>Dvir GH16-1</b>         | KVPSGDWLWPAIWMLP-SKWV--YGS-WPASGEIDIMESRGNRQ-YYD-PSG--QNVGTQLEASTLHWGPNPKFNK    |
| <b>Dvir GH16-2</b>         | KVPAGDWLWPAIWLLP-RYNQ--YST-WPASGEIDIMESRGNRQ-LTN-PSG--VNIGVQIGSTLHWGPNPNYQY     |
| <b>Dvir GH16-3</b>         | KVPAGDWLWPAIWLLP-RYNQ--YST-WPASGEIDIMESRGNRQ-LTN-PSG--VNIGVQIGSTLHWGPNPNYQY     |
| <b>Dvir GH16-4</b>         | KIPAGDWLWPAIWLLP-TYWK--YGG-WPTSSEIDIMESRGNRQ-LIS-QSG--RKIGVQTIQYTLNWGPNPDNLF    |
| <b>Dvir GH16-5</b>         | KVPLGDWLWPAIWLMP-RNNE--YSS-WPSSGEIDILESMGNKGYI-K-NG--VNIGVQEVGSTLHWGPNYSALNRY   |
| <b>Dvir GH16-6</b>         | KVPLGDWLWPAIWLMP-RNNE--YSS-WPSSGEIDILETRGNKN-YIK--NG--LNIGVQVGSSTLHWGPNYSALNRY  |
| <b>Dvir GH16-8</b>         | KVPTGDWLWPAIWLLPNKWI--NGD-WISSGEIDIMETRGNKE-LIK-PNG--QNIGTPLLSTLHWGANAQTNQY     |
| <b>Dvir GH16-9</b>         | KNPSGDWLWPAIWLLP-SKWV--YGG-WPRSSEIDIMESRGNRQ-LIAGSG--QNIGADLVA STLHWGPDAKNNK    |
| <b>Dpon ENN72429.1</b>     | KVPLGDWLFPALWMLP-KDSK--YGS-WPLSSEIDVME SRGNRN-LTD-SSG--NIVGVQSVSNTLHWGPKSKALDTP |
| <b>Dpon ENN78830.1</b>     | KVPAGDWLWPAIWLLP-SDYR--YGG-WPVAGEVDLVE SRGNRN-LTD-STG--LNIGTQLAFSTLEWGPSLEQNY   |

Dpon ENN78831.1 KLPGGDWLWPAIWLLP-TDWK--YGS-WPVSSEIDLVE SRGNRE-LTD-GSG--FNFQGTQLAFSTLHWGSPSPENQY  
Dpon ENN83076.1 KMPAGDWLWPAIWLLP-RYNA--YGT-WPSSSEIDLLE SRGNKD-YVN-PNG--MNVGTQVVGHTLHWAPSVGANQW  
Dpon ENN83093.1 KMPSGDWLWPAIWMLP-RFNS--YGR-WPASSEIDIVE SRGNKN-LFN-PQS--VNIGTQEAASTLHWGPFNQVQW  
Tmol ACS36221.1 KLPTGDWLWPAIWMLP-RWNQ--YSG-WPISSEIDIME SRGNAD-LVN-ASG--ANIGSKLVSSTLHWGPAINNMY  
Tcas XP\_970010.1 KLPAGDWLWPAIWFLP-RWNL--YSG-WPVSSEIDLME SRGNRN-LVN-GSG--VNIGTQMVGSTLHWGPASNMY  
Aaeg XP\_001652521.1 KLPQGDWLWPAIWLLP-KGDT--YGY-WPKSGEVDLME SRGNRN-LVQ--NN--EKIGIQKVVSSCLHFGDNPVNRSS  
Aaeg XP\_001664288.1 KLPAGDMMWPAVTFELP-KYNQ--YGG-WPASSEIDLLE SKGNRD-LIK--NG--INVGIEQVTSKLFQFNGEYVAG  
Aalb AAV90645.1 KLPRGDWLWPAIWLLP-KGDT--YGS-WPKSGEIDLLE SRGNRN-LML--NN--GNIGVGKVVSSCLHFGENPNLRSS  
Cqui XP\_001845811.1 KLPAGDWLWPAIWMLP-QQDS--YGV-WPKSGEIDLVE SRGNRE-LYQ--DG--KHIGVKLSSCLHFGESWNQKSE  
Cqui XP\_001845967.1 KLPTGDMMWPAIWMLP-RTNQ--YGT-WPASSEIDLME ARCNVD-YRD-EEG--THLGEVQVLSLHFGPNAWTNAY  
Adar EFR28384.1 KIPTGEWLWPAIWMLP-KLNQ--YGT-WPASSEIDLME SRGNLD-YTA--GG--QQIGVEHVGTMMHFGPPALNGY  
Acar ACI32832.1 KMPAGDWLWPAIWMLP-AFNS--YGT-WPASSEIDIVE SRGNRN-MLS--NG--VNIGTQEAGSTLHYGPPPLNGW  
Sfru ABR28478.2 KLPAGDWLWPAIWMLP-AYNT--YGT-WPASSEIDLVE SRGNRN-MF--NG--VHIGTQEAGSTLHYGPPPLNGW  
Onub ACI32836.1 KMPAGDWLWPAIWMLP-AFNV--YGT-WPASSEIDLVE SRGNRN-MLF--NG--VHIGTQETGSTLHYGPPDLNGW  
Bmor NP\_001159614.1 KMPSGDWLWPAIWMLP-AYNK--YGT-WPASSEIDLVE SRGNKN-MFL--NG--LHIGTQEAGSTLHYGPPPLSGW  
Mdar AAZ08492.1 KMPAGDWLWPAIWLLP-RYNE--YGP-WPASSEIDLSE SRGNRN-LTI--DG--LNIGTEICSSSTLHFGPFPDFGW  
Mdar AAZ08505.1 KLPAGDWLWPAIWLLP-RYNE--YGS-WPASSEIDLVE SRGNRN-LIK--NG--INIGSELSSSTLHFGFPPLNGY  
Cpun AFR46664.1 KLPAGDWTWPAIWLLP-RYNQ--YGS-WPASSEIDLVE SRGNKN-LIN--NG--QNIGSELSSSTLHFGFPPLNGY  
Ncor AEK64800.1 KMPAGDWLWPAIWLLP-RYNE--YGP-WPASSEIDLSE SRGNAN-LTS--KG--LNIGKELSLSTLHFGPYWPLNGY  
Rvir AEK64797.1 KLPAGDWLWPAIWLLP-RYNE--YGP-WPASSEIDLSE SRGNAN-LTS--KG--LNIGKELSLSTLHFGPYWPLNGY  
Rvir ADJ19024.1 KLPAGDWLWPAIWLLP-RFNF--YGS-WPSSSEIDLLE SRGNRQ-LIK--NG--QNIGSELSSSTLHFGFPPLNGY  
Pame AFR46666.1 KLPAGDWLWPAIWLLP-RYNQ--YGG-WPASSEIDLSE SRGNLN-YIS-PSG--QNIGSELSSSTLHFGFPPLNGY  
Cfor AGA16572.1 KLPAGDWLWPAIWLLP-RFNF--YGS-WPSSSEIDLLE SRGNRQ-LIK--NG--QNIGSELSSSTLHFGFPPLNGY  
Cpun AFR46663.1 KLPAGDWLWPAIWMLP-RYNE--YGS-WPASSEIDLSE SRGNRN-LTL--NG--LNIGSELSSSTLHFGFPPLNGW  
Lmig AFD54026.1 KLPAGDWLWPAIWMLP-RNNK--YGG-WPASSEIDLVE SRGNLG-LTQ--GG--VNIGAERVASTLHFGFPVVDAY  
Bgla ABO40828.1 RISKGDWIWPAIWMLP-RDNV--YGG-WPRSSEIDIME SRGNE-----VGIGISQVSSSTLHWGSPSPENNRW  
Calb AAZ04385.1 KIPKGDWLWPAIWMLP-RDRS--YGG-WPRSSEIDIME SRGNK--AVLWG--QNSGVNYVASTLHWGPDFNNRNF  
Hdis BAH84971.1 KIPKGDWIWPAIWMLP-PGWPKYGA-WPASSEIDIME SRGNVH-LSE-ANG--ATQGVDRVLSIHYGASPSQHRQ  
Pame ABR28480.1 KLPRGDWIWPAIWMLP-KNWX--YGD-WPRSSEIDIME SRGNND-YYD-SNG--VSQDDRMKSTLHWGPDANHNRY  
Dpul EFX72300.1 KMPRGDWLWPAIWMLP-TDSA--YGT-WPRSSEIDIVE IRGNAD-LTC--NDGQKIGNSKMFSTLHWGPFDSQNM  
Dpul EFX72306.1 KMPRGDWLWPAIWMLP-TDSA--YGT-WPRSSEIDIVE IRGNAD-LTC--NDGQKIGNSKMFSTLHWGPFDSQNM  
Dpul EFX65834.1 KMPRGDWLWPEISLMP-ANNV--YGE-WPRSGYIGLVSRGNNA-FTC--NG--QSAGNNVMESSELEWGLNNDHKS  
Dpul EFX69035.1 KMPKGDWIWPAIWMLP-TDSV--YGE-WPRSSEIDIVE IRGNAD-FSC--NG--YPIGRQLAGCTLHWGPDQNRNY  
Hmag XP\_002158311.2 KLPAGDWLWPAIWMLP-KYSV--YGG-WPASSEIDLVE SRGNEN-LTV-SKDLTQIGNRKVSQSLHWGPFPPQNGH  
Aque XP\_003388466.1 KLPAGDWLWPAIWMLP-RHNQ--YGV-WPSSSEIDIME SRGNAIGYSE-----GGYDSFGSTLHWGIDYMYNFF  
Mcir EPB91375.1 RLPTGDWLWPAIWMLP-KYSA--YGS-WPASSEIDILE SKGNPK-YAH-----GNTSTIMSTLHWGPNTYQNKY  
Bbas EJP68643.1 RLPKGDWLWPAIWMLP-EGDV--YGA-WPRSSEIDIME SRGNPEYSE-----GGRNWWYGTLHWGPTPRSDAY  
Cmil EGX89530.1 KLPAGDWLWPAIWMLP-ESDA--YGT-WPRSSEIDIME SRGNPDYAE-----GGRNWWYGTLHWGPTPKTDY  
Clus XP\_002618376.1 KLPKGDWLWPAIWLLP-KNNT--YGP-WPASSEIDIAE SRGNVHYPM-----GGHDVSSSLHWGPDVAQDQY  
Fmed EJD07749.1 KMPRGDWLWPAIWMLP-KDEK--YGA-WPRSSEIDIVE ARGNSASYPR-----QGNFVFRGSLNWGLDVTV--  
Gtra EPQ53062.1 KNPVGDWLWPAVWMLP-VNNT--YGP-WPMSSEIDIME SRGNLSYTA-----QGSNYVHGSLSNWGLPTLWNEV  
Cant ACD93221.1 RLPKGDWLWPAFWMMLP-QNSE--YGT-WPRSSEIDITE YRQRP-----QQILGLTHFGAAPPDNKGD  
Amac YP\_008173608.1 KMPEGQGSWPAFWMLP-TDEV--YGG-WPRSSEIDIVE AVNLKAADAE-----G-NPESHIYGLTHYGEWPNND  
Pfla WP\_010607480.1 KLPAGQGSWPAFWMLP-TDEV--YGG-WPKSGEIDIME AVNLKVADE-----G-SVESNVHGTLHYGRDWPNNVH  
Gjoo WP\_017446697.1 KLPAGQGSWPAFWMLP-TDNV--YGG-WPHSGEIDILE AVNLKVPLEG-----SDDLESSVHGTLHYGKSWPNAS  
Mmar YP\_755478.1 QLPEQGSWPAIWMLP-TDEV--YGG-WAASGEIDILE AVNLGEPRE-----CRGDVENRVTLHYGGEWPEPNTY  
Rmai WP\_008695923.1 KLPVAGIWSAIWMLP-TNDA--YGG-WAASGEIDIME MKG-----QEPDEVLTGLHYGDVWPRNAY

C

Dvir GNBP-1 YEVPDAVVEVYEPKGFVTSIPDEEGIK-LFAFHGKINDEF-DG-LEAGT-----FARDILKPRNGSWT  
Dvir GNBP-2 YEVPAAATVEVYHPKGFVSIPDEEDGK-LFSFHGNINQEM-DG-REAGT-----FSRDLILRPVNGMWT  
Dvir GNBP-3 YNGQRTNGKFGNPNVTFPGDFRQAQGLFNQFKNSVSEY-QQ-KNGNGEIKVLNPSNIADLANIFTKNLQKQNPNN  
Dpon AEE61901.1 FEVPDATVEAFTPRGLRVSIPDQDGK-LFALHAKINEEM-NG-REAGT-----FSRDLITKAKDGRWT  
Dpon ENN74344.1 YQVPTPTFEAFKPKGFRVSIIPDDEKVE-LFAFHGKINKPI-IQ-IEPGD-----FSQDVLKAVNGRFS  
Dpon ENN74953.1 FEVPDATVEAFTPRGLRVSIPDQDGK-LFALHAKINEEM-NG-REAGT-----FSRDLITKAKDGRWT  
Dpon ENN76697.1 YAVPEPKIDIFDTKGRVSIIPDGFLE-LFAFHGKINEEM-NG-LEAGQ-----FSKDLITKACGDLWV  
Tcas EFA01356 FEVPDALVEVFPQGLRVSIPDQEGIK-LFAFHAKVNEEM-NG-REGGT-----FSRDLITKAKHGRWT  
Tcas NP\_001164284.1 FVIPDVTLEAYAPKGFRAIPALPGIQ-MFAFHMNVNKKI-SQ-VDPGD-----YRQDYTSPDGNVWS  
Tmol BAC99308 FEVPDALVEVFRPRGLRVSIPDQEGIK-LFAFHGKINEEM-NG-REGGT-----FSRDLITKAKHGRWT  
Bmx BAA92243.1 YEAPPATLEAIHPKGLRVSVPD-BGFS-LFAFHGKLNEM-EG-LEAGH-----WSRDLITKPKNGRWT  
Pxy1 AFK24449.1 YEVPKLEAIYPAGLRVSIIPD-DGFS-LFAFHGKLNEM-EG-LEAGH-----WSRDLITRPNKNNRWV  
Pint AAM95970.1 YVVPKLEAIYPKGLRVSIPD-DGFS-LFAFHGKLNEM-EG-LEAGH-----WARDITKPKRGRWT  
Slit ACI32819.1 FPATPTVEAFQPKGFRVILK-DGYS-FVGFGRNINVDNFNG-LNEGQ-----IHKDITHAQKGYWI  
dmel AAF49244.1 YKIPTPTVELLE-TGFSVSIIPDEEGVK-VVAFVNNRNRNF-TSFINEGQ-----YVRLTEPQNGRWT  
dmel AAF49246.3 -----EGFEVSIIPDEEGIQ-VVVFYNIIDTC-PA-L-----MDYITEAVNGSWV  
dmel AAF50349.1 YEVPKAKIDVFPYKGFVSIIPDEEGIT-LFAFHGKLNEM-EG-LEAGT-----WARDIVKAKNGRWT  
dmel CG30148 YEAPAEQVRVFPYPRGFEVSIIPDDEGIS-LFAFHGKLNEM-EG-LEAGQ-----WSRDLIPKAKNGRWT  
Ame1 NP\_001157186.1 YVPPTPSVEPLYPVGLRMSIADEAGIS-LVAYHVKFNDDF-YS-LEAGT-----IARDIHKPRNGYVW  
Spur XP\_001176934.2 YDMKNPEISLLTTGGIRFAYPDEPGIT-LFAFHYSINTPL-SG-VNVGQ-----YNYDVTTKTGAYFV  
Cint XP\_002126690.1 YSVQQPIISLMEPTGLMFYPPDDGNIN-LVSYHYSINTPL-PD-VQAGT-----YNDVSESTNGYFT  
Cgig BAG82629.1 LSIQPAIWEQYNGHGKFTIPDDGNYD-FVAVHYSINQPI-AG-VGAGQ-----WAFDVTHTKQSSFV

```

Dvir GNB-1 FRD--RETRLKKGD-----I IYYWLYVDYNGRNTLGYRKTDDQYEVRE--FSN
Dvir GNB-2 FSD--RSTKLRVGD-----K IYYWTYVEYGDEYEKRGYPKDDQVFTVTN--LIK
Dvir GNB-3 FL---PIVKVRYEDGPEGPENIYQIIPNKRNSADLSKTLVDLWNNITEPNNTNFTSPTPPSESTGYDE--ST
Dpon AEE61901.1 FYD--SQAKLAVGD-----TLYFVTFVDYFDGERKLG FVRDDQFFTITE--LLP
Dpon ENN74344.1 YTD--PNIKLEKEND-----VINYWIFVQ---HDQLGFRIDEQSWTVDE--LRP
Dpon ENN74953.1 FYD--SQAKLAVGD-----TLYFVTFVDYFDGERKLG FVRDDQFFTITE--LLP
Dpon ENN76697.1 FED--NTEKLVVGN-----TLYYWL FVI---RNRLGHR YDNGK FVVRD--ITS
Tcas EFA01356 FYD--PYAKLKIGD-----T IYYWTYVDYFDGKNKLG YTKDDQEFVVRQ--LLD
Tcas NP_001164284.1 YFN--SDLSLNIGD-----TVNYWIFVQ---HEKLG YR KDNVEWTVTE--LLQ
Tmol BAC99308 FYD--ANARLKEGD-----I LYYWTYVDYFDGKNKLG YPNDDQEFVVKQ--LLD
Bmox BAA92243.1 FRD--RNAALKIGD-----K IYFVTFVI---KDGLG YR QDNGEWTVEG--FVD
Pxy1 AFK24449.1 FSD--KQARLKIGD-----K VYFVTFVI---KNGLG YR QDDGQVWTVEG--FVD
Pint AAM95970.1 FRD--RNVKLLKGD-----K IYFVTFVI---KDGLG YR QDNGEWTVEG--FVN
Slit ACI32819.1 YRN--REVKLNIGD-----TLYYWL FVQ---KNGKGF LTELAYTVTQ--FVN
dmel AAF49244.1 TNF--SSVPLRSQD-----VLYLW TSVQ---HQKAVYQDLAQLPVCN--LGG
dmel AAF49246.3 SK---QKMSLQNN-----K LQISMLVQ---FNEEI FEKSETRVIINTRLLTT
dmel AAF50349.1 FRD--RITALKPGD-----TLYYWT YVI---YNGLG YR EDDGSFVVNG--YSG
dmel CG30148 FRD--HKTKLNHGD-----TLYFVTF YVI---YNGLG YR QDEGAHVVT--Y--
Ame1 NP_001157186.1 YED--RSTRKLLGD-----I IYYWIHVV---YNGLG YNLLDQKHVVNE--FYN
Spur XP_001176934.2 HEN--TEVDVKKGD-----V VNYWVYVN---Y YGPGYQLLEQSWTASE--APA
Cint XP_002126690.1 LQN--FNVAVVPGD-----E VNYWVNV I---TSTGG YLLTDQTWVAQG--PT
Cgig BAG82629.1 HTNDLPAIQVHKGD-----T VYYW LHAQ---KGGTPSEL LQSAVIGD--LTT

```

**Figure S3. Multiple alignments of *D. v. virgifera* GH16 family protein sequences.** A. GH16 family proteins identified from the *D. v. virgifera* transcriptome. B. The active site region sequences. GNB-1 sequences are boxed. The catalytic nucleophile and proton donor residues are highlighted with magenta and green, respectively (based on Viladot *et al.* 1998, *Biochemistry* **34**: 11332). C. The N-terminal conserved domain sequences of GNBPs. Residue shown to be within hydrogen-binding distances and involved in hydrophilic interaction with lamitrihexaoses on *Plodia interpunctella* and *Bombyx mori* proteins are highlighted with yellow, and Arg's involved in binding of triplex  $\beta$ -glucan are highlighted in light blue (based on Kanagawa *et al.*, 2011, *J Biol Chem* **286**: 19158).
