# Supplementary material for: Molecular Evolution of Glycoside Hydrolase Genes in the Western Corn Rootworm (Diabrotica virgifera virgifera)
Source: PubMed Central journal article supplement (PMC3981738; doi:10.1371/journal.pone.0094052), 2014-04-09
Supplement: pone.0094052.s008.pdf [file pone.0094052.s008.pdf]

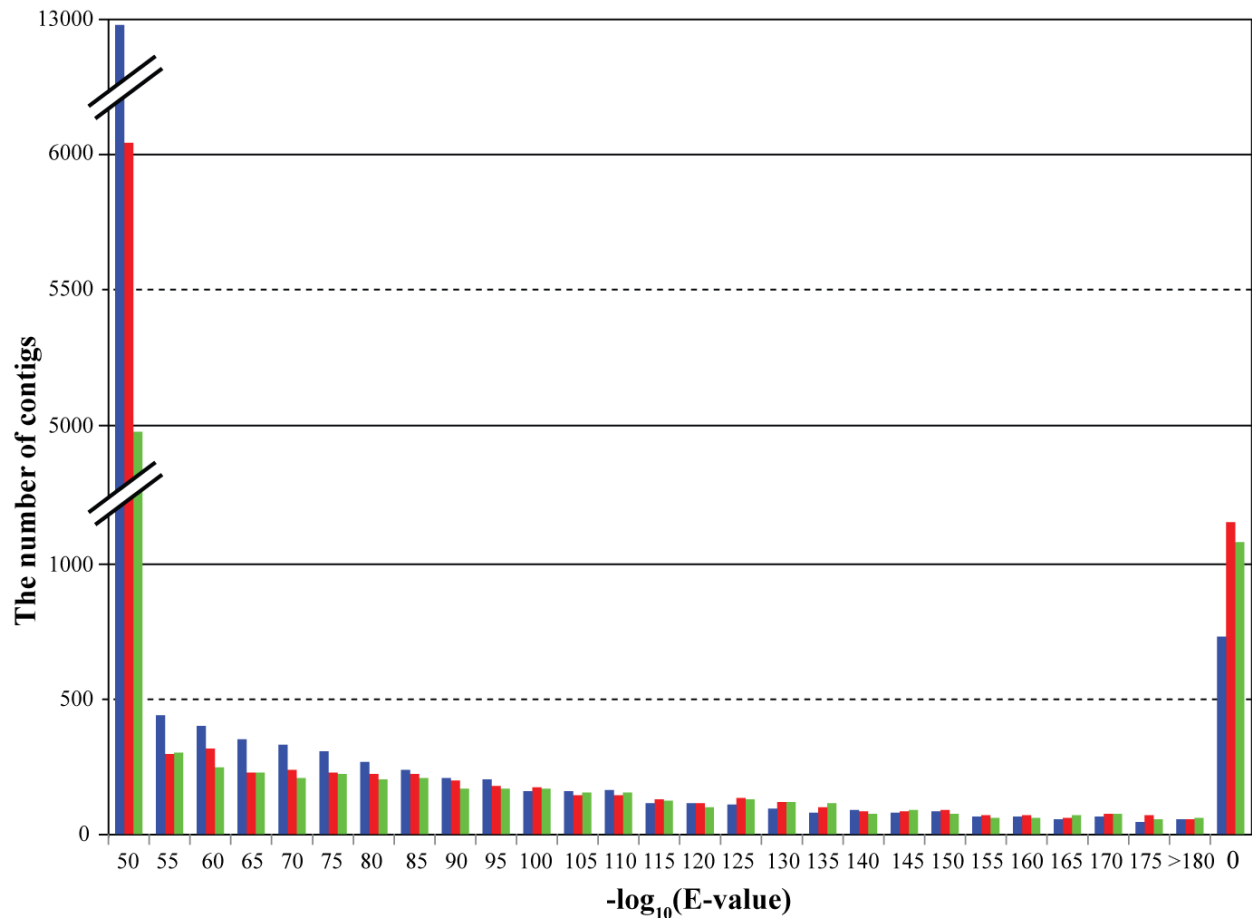

**Figure S8** The distribution of E-values obtained from blastx similarity search against the UniProt protein database using the assemblies generated by three programs using the *D. v. virgifera* egg samples. The numbers of contigs are 18,173 in Mira (blue), 11,035 in Trinity (red), and 9843 in Velvet/Oasis (green). E-values are shown as  $-\log_{10}(\text{E-value})$  except for E-value=0. Note that there is no significant difference between Trinity and Mira ( $t$ -test  $P > 0.5$  for both E-value  $\leq 10^{-100}$  and for all E-values).
