# Supplementary material for: Molecular Evolution of Glycoside Hydrolase Genes in the Western Corn Rootworm (Diabrotica virgifera virgifera)
Source: PubMed Central journal article supplement (PMC3981738; doi:10.1371/journal.pone.0094052), 2014-04-09
Supplement: pone.0094052.s009.pdf [file pone.0094052.s009.pdf]

**Table S1. Summary statistics for *D. v. virgifera* transcriptome sequencing and assembly.**

| <b>egg 0-10 day total RNA (Illumina, paired-end)</b>                                    |                               |
|-----------------------------------------------------------------------------------------|-------------------------------|
| Total number of paired-end reads before filtering (length)                              | 38,657,737 (2,899,330,275 bp) |
| Number of paired-end reads that entered assembly after > Q20 filtering (length)         | 15,162,017 (1,137,151,275 bp) |
| Assembly program used                                                                   | Trinity (2013-02-25)          |
| Total number of contigs                                                                 | 72,638                        |
| Average contig length (range)                                                           | 825 bp (201 – 13,911 bp)      |
| N50 length                                                                              | 1,357 bp                      |
| Assembly program used                                                                   | Velvet/Oasis (ver. 1.2.03)    |
| Total number of contigs                                                                 | 56,135                        |
| Average contig length (range)                                                           | 583 bp (100 – 10,434 bp)      |
| N50 length                                                                              | 850 bp                        |
| Assembly program used                                                                   | Mira (ver. 3.4.0)             |
| Total number of contigs                                                                 | 69,815                        |
| Average contig length (range)                                                           | 520 bp (100 – 13,526 bp)      |
| N50 length                                                                              | 850 bp                        |
| <b>Third larval midgut RNA (Illumina, paired-end)</b>                                   |                               |
| Total number of paired-end reads before filtering (length)                              | 76,202,715 (5,715,203,625 bp) |
| Number of paired-end reads that entered assembly after > Q20 filtering (length)         | 44,852,488 (3,363,936,600 bp) |
| Assembly program used                                                                   | Trinity (2013-02-25)          |
| Total number of contigs                                                                 | 72,325                        |
| Average contig length (range)                                                           | 859 bp (201 – 17,831 bp)      |
| N50 length                                                                              | 1,435 bp                      |
| Assembly program used                                                                   | Velvet/Oasis (ver. 1.2.03)    |
| Total number of contigs                                                                 | 96,215                        |
| Average contig length (range)                                                           | 635 bp (100 – 17,673 bp)      |
| N50 length                                                                              | 1,180 bp                      |
| <b>Third larval midgut RNA (Roche 454)</b>                                              |                               |
| Total number of reads before filtering (length)                                         | 664,431 (361,187,777 bp)      |
| Number of reads that entered assembly after filtering (removing the adapters and > Q20) | 415,742 (210,423,467 bp)      |
| Assembly program used                                                                   | Trinity (2013-02-25)          |
| Total number of contigs                                                                 | 37,181                        |
| Average contig length (range)                                                           | 614 bp (201 – 5,044 bp)       |
| N50 length                                                                              | 743 bp                        |

|                               |                     |
|-------------------------------|---------------------|
| Assembly program used         | Newbler (ver. 2.5)  |
| Total number of contigs       | 45,994              |
| Average contig length (range) | 535 bp (51 – 4,098) |
| N50 length                    | 595 bp              |

|                               |                            |
|-------------------------------|----------------------------|
| Assembly program used         | Velvet/Oasis (ver. 1.2.03) |
| Total number of contigs       | 165,361                    |
| Average contig length (range) | 322 bp (100 – 5,807 bp)    |
| N50 length                    | 481 bp                     |

|                               |                         |
|-------------------------------|-------------------------|
| Assembly program used         | Mira (ver. 3.4.0)       |
| Total number of contigs       | 57,923                  |
| Average contig length (range) | 762 bp (100 – 3,032 bp) |
| N50 length                    | 853 bp                  |

### **Neonates RNA (Illumina Hi-seq, paired-end)**

|                                                                                 |                                       |
|---------------------------------------------------------------------------------|---------------------------------------|
| Total number of paired-end reads before filtering (length)                      | 1,347,291,731<br>(136,076,464,831 bp) |
| Number of paired-end reads that entered assembly after > Q30 filtering (length) | 721,697,288<br>(72,891,426,088 bp)    |

|                               |                          |
|-------------------------------|--------------------------|
| Assembly program used         | Trinity                  |
| Total number of contigs       | 155,787                  |
| Average contig length (range) | 937 bp (201 – 25,737 bp) |
| N50 length                    | 1,817 bp                 |

---
