# Supplementary material for: Molecular Evolution of Glycoside Hydrolase Genes in the Western Corn Rootworm (Diabrotica virgifera virgifera)
Source: PubMed Central journal article supplement (PMC3981738; doi:10.1371/journal.pone.0094052), 2014-04-09
Supplement: pone.0094052.s010.pdf [file pone.0094052.s010.pdf]

**Table S2. Summary of *D. v. virgifera* transcriptome sequencing and assemblies.**

|                                          |              | <b>Egg</b>                  | <b>Larval midgut</b>        | <b>Larval midgut</b> | <b>Neonates</b>    |
|------------------------------------------|--------------|-----------------------------|-----------------------------|----------------------|--------------------|
| Sequencing platform                      |              | Illumina Genome Analyzer II | Illumina Genome Analyzer II | 454 Titanium         | Illumina HiSeq2000 |
| Read length                              |              | 75 bp                       | 75 bp                       | NA                   | 101 bp             |
| Total reads <sup>a</sup>                 |              | 15.1 M                      | 44.8 M                      | 415,742              | 721 M              |
| Total number of contigs (average length) | Trinity      | 72,638 (825 bp)             | 72,325 (859 bp)             | 37,181 (614 bp)      | 155,787 (914 bp)   |
|                                          | Newbler      | NA                          | NA                          | 45,994 (535 bp)      | NA                 |
|                                          | Velvet/Oasis | 56,135 (520 bp)             | 96,215 (635 bp)             | 165,361 (322 bp)     | NA                 |
|                                          | Mira         | 69,815 (520 bp)             | NA                          | 57,923 (762 bp)      | NA                 |

<sup>a</sup>Numbers of reads used for assembly after filtering. M: million paired-end.
