# Supplementary material for: Molecular Evolution of Glycoside Hydrolase Genes in the Western Corn Rootworm (Diabrotica virgifera virgifera)
Source: PubMed Central journal article supplement (PMC3981738; doi:10.1371/journal.pone.0094052), 2014-04-09
Supplement: pone.0094052.s011.pdf [file pone.0094052.s011.pdf]

**Table S3. Summary statistics for hybrid and pooled-data assembly of *D. v. virgifera* transcriptome.**

| <b>Hybrid (454 + Illumina) assembly of third larval midgut</b>         |                            |
|------------------------------------------------------------------------|----------------------------|
| Assembly program used                                                  | Trinity (2013-02-25)       |
| Total number of contigs                                                | 81,858                     |
| Average contig length (range)                                          | 862 bp (201 – 17,831 bp)   |
| N50 length                                                             | 1,396 bp                   |
| Assembly program used                                                  | Velvet/Oasis (ver. 1.2.03) |
| Total number of contigs                                                | 133,276                    |
| Average contig length (range)                                          | 425 bp (100 - 16,733 bp)   |
| N50 length                                                             | 675 bp                     |
| <b>Hybrid (454 + Illumina) assembly of egg and third larval midgut</b> |                            |
| Assembly program used                                                  | Trinity (2012-03-17)       |
| Total number of contigs                                                | 101,915                    |
| Average contig length (range)                                          | 662 bp (201 – 13,611 bp)   |
| N50 length                                                             | 1,006 bp                   |
| <b>The pooled read dataset (egg + neonates + third larval midgut)</b>  |                            |
| Assembly program used                                                  | Trinity (2013-02-25)       |
| Total number of contigs                                                | 163,871                    |
| Average contig length (range)                                          | 914 bp (201 – 31,064 bp)   |
| N50 length                                                             | 1,396 bp                   |
