# Supplementary material for: Molecular Evolution of Glycoside Hydrolase Genes in the Western Corn Rootworm (Diabrotica virgifera virgifera)
Source: PubMed Central journal article supplement (PMC3981738; doi:10.1371/journal.pone.0094052), 2014-04-09
Supplement: pone.0094052.s012.pdf [file pone.0094052.s012.pdf]

**Table S4. Expression analysis of *D. v. virgifera* GH family genes identified in this study.<sup>a</sup>**

| Genes    | Length (AA) <sup>b</sup> | Egg (38,657,737) <sup>c</sup> |       | Neonate (21,864,095) <sup>c</sup> |         | 3rd-instar midgut (40,096,158) <sup>c</sup> |         |
|----------|--------------------------|-------------------------------|-------|-----------------------------------|---------|---------------------------------------------|---------|
|          |                          | Read <sup>d</sup>             | RPKM  | Read <sup>d</sup>                 | RPKM    | Read <sup>d</sup>                           | RPKM    |
| GH45-1   | 720 (239)                | 1                             | 0.04  | 4053                              | 258.59  | 888                                         | 30.89   |
| GH45-2   | 741 (246)                | 2                             | 0.07  | 343                               | 21.26   | 485                                         | 16.39   |
| GH45-3   | 729 (242)                | 3                             | 0.11  | 9                                 | 0.57    | 142                                         | 4.88    |
| GH45-4   | 741 (246)                | 5                             | 0.18  | 2135                              | 132.30  | 26621                                       | 899.63  |
| GH45-5   | 729 (242)                | 0                             | 0     | 12                                | 0.76    | 79                                          | 2.71    |
| GH45-6*  | 615 (204)                | 1                             | 0.04  | 15                                | 1.12    | 538                                         | 21.92   |
| GH45-7   | 720 (239)                | 2                             | 0.07  | 61252                             | 3907.24 | 228852                                      | 7960.36 |
| GH45-8   | 717 (238)                | 6                             | 0.19  | 14                                | 0.89    | 86                                          | 3.00    |
| GH45-9   | 720 (239)                | 0                             | 0     | 796                               | 50.78   | 2473                                        | 86.02   |
| GH45-10  | 717 (238)                | 4                             | 0.14  | 11641                             | 745.75  | 67084                                       | 2343.23 |
| GH45-11  | 735 (244)                | 2                             | 0.07  | 31                                | 1.94    | 656                                         | 22.35   |
| GH48-1   | 1926 (641)               | 1                             | 0.01  | 3                                 | 0.07    | 26                                          | 0.33    |
| GH48-2*  | 374 (124)                | 1                             | 0.06  | 0                                 | 0       | 2                                           | 0.13    |
| GH48-3   | 1926 (641)               | 2                             | 0.02  | 302                               | 7.18    | 965                                         | 12.51   |
| GH28-1   | 1098 (365)               | 0                             | 0     | 171                               | 7.14    | 319                                         | 7.27    |
| GH28-2   | 1098 (365)               | 0                             | 0     | 384                               | 16.04   | 1098                                        | 25.01   |
| GH28-3   | 1116 (371)               | 0                             | 0     | 36                                | 1.48    | 175                                         | 3.92    |
| GH28-4*  | 1097 (365)               | 21                            | 0.50  | 3                                 | 0.13    | 221                                         | 5.03    |
| GH28-5   | 1062 (353)               | 0                             | 0     | 55                                | 2.38    | 294                                         | 6.92    |
| GH28-6   | 1092 (363)               | 2                             | 0.05  | 707                               | 29.69   | 11750                                       | 269.09  |
| GH28-7   | 1071 (356)               | 1                             | 0.02  | 18                                | 0.77    | 192                                         | 4.48    |
| GH28-8*  | 855 (284)                | 5                             | 0.15  | 1                                 | 0.05    | 3                                           | 0.08    |
| GH28-9   | 1101 (366)               | 6                             | 0.14  | 184                               | 7.66    | 1105                                        | 25.10   |
| GH28-10* | 813 (270)                | 22                            | 0.70  | 1                                 | 0.06    | 4                                           | 0.12    |
| GH28-11  | 1062 (353)               | 4                             | 0.09  | 2                                 | 0.09    | 8                                           | 0.18    |
| GH28-12  | 1068 (355)               | 1                             | 0.02  | 3                                 | 0.13    | 18                                          | 0.42    |
| GH28-13  | 1104 (367)               | 1                             | 0.02  | 28                                | 1.16    | 15                                          | 0.33    |
| GH28-14* | 366 (122)                | 0                             | 0     | 3                                 | 0.37    | 3                                           | 0.20    |
| GH16-1   | 1125 (374)               | 3                             | 0.07  | 36861                             | 1502.60 | 39623                                       | 880.75  |
| GH16-2   | 1116 (371)               | 668                           | 15.53 | 497                               | 20.42   | 1297                                        | 29.06   |
| GH16-3   | 1119 (372)               | 614                           | 14.23 | 501                               | 20.53   | 1425                                        | 31.85   |
| GH16-4   | 1113 (370)               | 573                           | 13.35 | 262                               | 10.80   | 31                                          | 0.70    |
| GH16-5   | 1149 (382)               | 69                            | 1.56  | 5                                 | 0.20    | 331                                         | 7.20    |
| GH16-6*  | 696 (232)                | 0                             | 0     | 0                                 | 0       | 1071                                        | 38.38   |
| GH16-7*  | 448 (149)                | 1                             | 0.06  | 6                                 | 0.61    | 2                                           | 0.11    |
| GH16-8*  | 925 (307)                | 69                            | 1.93  | 506                               | 25.02   | 31                                          | 0.84    |
| GH16-9*  | 842 (280)                | 10                            | 0.31  | 4                                 | 0.22    | 13                                          | 0.39    |
| GNBP-1   | 1353 (450)               | 40                            | 0.76  | 173                               | 5.85    | 34                                          | 0.63    |
| GNBP-2   | 1500 (499)               | 301                           | 5.19  | 53                                | 1.62    | 48                                          | 0.80    |
| GNBP-3   | 1671 (556)               | 408                           | 6.32  | 0                                 | 0       | 0                                           | 0       |
| GH5*     | 317 (105)                | 6                             | 0.49  | 0                                 | 0       | 0                                           | 0       |

|          |             |      |       |      |        |       |        |
|----------|-------------|------|-------|------|--------|-------|--------|
| GH1-1    | 1491 (496)  | 1    | 0.02  | 27   | 0.83   | 5     | 0.08   |
| GH1-2    | 1458 (485)  | 1    | 0.02  | 558  | 17.50  | 2637  | 45.11  |
| GH1-3    | 1497 (498)  | 1    | 0.02  | 158  | 4.83   | 533   | 8.88   |
| GH1-4    | 1494 (497)  | 2    | 0.03  | 1561 | 47.79  | 303   | 5.06   |
| GH1-5    | 1509 (502)  | 5    | 0.09  | 2787 | 84.47  | 7932  | 131.10 |
| GH1-6    | 1458 (485)  | 0    | 0     | 56   | 1.76   | 1117  | 19.11  |
| GH1-7    | 1542 (513)  | 4    | 0.07  | 193  | 5.72   | 4099  | 66.30  |
| GH1-8    | 1584 (527)  | 5    | 0.08  | 501  | 14.47  | 76    | 1.20   |
| GH1-9    | 1686 (561)  | 3    | 0.05  | 2016 | 54.69  | 53    | 0.78   |
| GH1-10   | 1461 (486)  | 3    | 0.05  | 64   | 2.00   | 429   | 7.32   |
| GH1-11   | 2073 (690)  | 95   | 1.19  | 3    | 0.07   | 0     | 0      |
| GH1-12   | 1551 (516)  | 357  | 5.95  | 1    | 0.03   | 11    | 0.18   |
| GH1-13   | 1464 (487)  | 29   | 0.51  | 202  | 6.31   | 1232  | 20.99  |
| GH1-14   | 1452 (483)  | 1    | 0.02  | 338  | 10.65  | 1735  | 29.80  |
| GH1-15   | 1494 (497)  | 2    | 0.03  | 321  | 9.83   | 4033  | 67.32  |
| GH1-16   | 1479 (492)  | 0    | 0     | 314  | 9.71   | 2494  | 42.06  |
| GH1-17   | 1524 (507)  | 2    | 0.03  | 2137 | 64.13  | 6239  | 102.10 |
| GH1-18   | 1491 (496)  | 5    | 0.09  | 5590 | 171.48 | 15378 | 257.23 |
| GH1-19   | 1488 (495)  | 0    | 0     | 1855 | 57.02  | 8355  | 140.04 |
| GH1-20   | 1539 (512)  | 19   | 0.32  | 68   | 2.02   | 13    | 0.21   |
| GH1-21   | 1494 (497)  | 0    | 0     | 162  | 4.96   | 2340  | 39.06  |
| GH1-22   | 1530 (509)  | 0    | 0     | 309  | 9.24   | 521   | 8.49   |
| GH1-23   | 1024 (340)  | 0    | 0     | 1    | 0.04   | 2     | 0.05   |
| GH1-24*  | 1280 (426)  | 12   | 0.24  | 185  | 6.61   | 339   | 6.61   |
| GH1-25*  | 515 (171)   | 0    | 0     | 0    | 0      | 1     | 0.05   |
| GH1-26*  | 1345 (448)  | 5    | 0.10  | 0    | 0      | 0     | 0      |
| GH1-27*  | 491 (162)   | 2    | 0.11  | 23   | 2.14   | 67    | 3.40   |
| GH1-28*  | 625 (208)   | 8    | 0.33  | 62   | 4.54   | 135   | 5.39   |
| GH31-1   | 3033 (1010) | 239  | 2.04  | 64   | 0.97   | 171   | 1.41   |
| GH31-2   | 2727 (908)  | 9758 | 92.56 | 2607 | 43.72  | 11733 | 107.31 |
| GH31-3   | 2574 (857)  | 2926 | 29.41 | 2823 | 50.16  | 9145  | 88.61  |
| GH31-4   | 2625 (874)  | 829  | 8.17  | 6016 | 104.82 | 7971  | 75.73  |
| GH31-5   | 2559 (852)  | 424  | 4.29  | 258  | 4.61   | 2352  | 22.92  |
| GH31-6   | 1881 (626)  | 17   | 0.23  | 328  | 7.98   | 4535  | 60.13  |
| GH31-7   | 1917 (638)  | 27   | 0.36  | 1280 | 30.54  | 30747 | 400.02 |
| GH31-8   | 1941 (646)  | 19   | 0.25  | 73   | 1.72   | 397   | 5.10   |
| GH31-9   | 1908 (635)  | 361  | 4.89  | 493  | 11.82  | 1175  | 15.36  |
| GH31-10* | 2781 (927)  | 56   | 0.52  | 566  | 9.31   | 7182  | 64.41  |
| GH27-1   | 1236 (411)  | 1870 | 39.11 | 1396 | 51.62  | 12256 | 247.10 |
| GH27-2   | 1338 (445)  | 94   | 1.82  | 70   | 2.39   | 217   | 4.04   |

<sup>a</sup>Genes considered as not expressed (RPKM < 0.3 or the number of reads < 10) are marked with grey shade.

<sup>b</sup>Lengths of the transcript (bp) as well as its translated protein in parentheses (amino acids) are shown.

<sup>c</sup>The total numbers of paired-end reads before filtering are shown in parentheses. Note that although the reads were not filtered, we used 0 mismatch to map the reads to the assembled transcriptome. Thus reads that included any ambiguity including unknown nucleotide 'N' were not counted.

<sup>d</sup>The number of paired-end reads mapped.

\*The partial ORFs, not including from start to stop codons.
