# Supplementary material for: Molecular Evolution of Glycoside Hydrolase Genes in the Western Corn Rootworm (Diabrotica virgifera virgifera)
Source: PubMed Central journal article supplement (PMC3981738; doi:10.1371/journal.pone.0094052), 2014-04-09
Supplement: pone.0094052.s013.pdf [file pone.0094052.s013.pdf]

Table S5. Coleopteran species and GH protein sequences used in this study.

| Species                                | GH9  | GH5                                                                                              | GH45                                                                                                                                                                               | GH48                                                                       | GH28                                                                                                                                                                                                                                                                                           | GH16 | GH1 | GH31 | GH27 | GH11                     |
|----------------------------------------|------|--------------------------------------------------------------------------------------------------|------------------------------------------------------------------------------------------------------------------------------------------------------------------------------------|----------------------------------------------------------------------------|------------------------------------------------------------------------------------------------------------------------------------------------------------------------------------------------------------------------------------------------------------------------------------------------|------|-----|------|------|--------------------------|
| <b>[Chrysomeloidea]</b>                |      |                                                                                                  |                                                                                                                                                                                    |                                                                            |                                                                                                                                                                                                                                                                                                |      |     |      |      |                          |
| <i>Chrysomela tremulae</i>             | None | None                                                                                             | ADU33285.1 Ctre_GH45-1<br>ADU33286.1 Ctre_GH45-2                                                                                                                                   | ADU33283.1 Ctre_GH48_1<br>ADU33284.1 Ctre_GH48_2                           | ACP18831.1 Ctre_GH28-1<br>ADU33275.1 Ctre_GH28-2<br>ADU33276.1 Ctre_GH28-3<br>ADU33277.1 Ctre_GH28-4<br>ADU33278.1 Ctre_GH28-5<br>ADU33279.1 Ctre_GH28-6<br>ADU33280.1 Ctre_GH28-7<br>ADU33281.1 Ctre_GH28-8<br>ADU33282.1 Ctre_GH28-9                                                         | -    | -   | -    | -    | -                        |
| <i>Gastrophysa viridula</i>            | None | ADU33333.1 Gvir_GH5                                                                              | ADU33334.1 Gvir_GH45                                                                                                                                                               | ADU33335.1 Gvir_GH48_1<br>ADU33336.1 Gvir_GH48_2<br>ADU33337.1 Gvir_GH48_3 | ADU33338.1 Gvir_GH28-1<br>ADU33339.1 Gvir_GH28-2<br>ADU33340.1 Gvir_GH28-3<br>ADU33341.1 Gvir_GH28-4<br>ADU33342.1 Gvir_GH28-5<br>ADU33343.1 Gvir_GH28-6<br>ADU33344.1 Gvir_GH28-7                                                                                                             | -    | -   | -    | -    | -                        |
| <i>Leptinotarsa decemlineata</i>       | None | None                                                                                             | ADU33345.1 Ldec_GH45-1<br>ADU33346.1 Ldec_GH45-2<br>ADU33347.1 Ldec_GH45-3<br>ADU33348.1 Ldec_GH45-4<br>ADU33349.1 Ldec_GH45-5<br>ADU33350.1 Ldec_GH45-6<br>ADU33351.1 Ldec_GH45-7 | ADU33352.1 Ldec_GH48_1<br>ADU33353.1 Ldec_GH48_2<br>ADU33354.1 Ldec_GH48_3 | ADU33355.1 Ldec_GH28-1<br>ADU33356.1 Ldec_GH28-2<br>ADU33357.1 Ldec_GH28-3<br>ADU33358.1 Ldec_GH28-4<br>ADU33359.1 Ldec_GH28-5<br>ADU33360.1 Ldec_GH28-6<br>ADU33361.1 Ldec_GH28-7<br>ADU33362.1 Ldec_GH28-8<br>ADU33363.1 Ldec_GH28-9<br>ADU33364.1 Ldec_GH28-10<br>AEX93414.1 Ldec_GH28-11** | -    | -   | -    | -    | -                        |
| <i>Phaedon cochleariae</i>             | -    | -                                                                                                | CCJ09450.1 Pcoc_GH45-1<br>CCJ09451.1 Pcoc_GH45-2<br>CCJ09452.1 Pcoc_GH45-3<br>CCJ09453.1 Pcoc_GH45-4<br>CCJ09454.1 Pcoc_GH45-5<br>CCJ09455.1 Pcoc_GH45-6<br>CCJ09456.1 Pcoc_GH45-7 | -                                                                          | CCJ09441.1 Pcoc_GH28-1<br>CCJ09442.1 Pcoc_GH28-2<br>CCJ09443.1 Pcoc_GH28-3<br>CCJ09444.1 Pcoc_GH28-4<br>CCJ09445.1 Pcoc_GH28-5<br>CCJ09446.1 Pcoc_GH28-6<br>CCJ09447.1 Pcoc_GH28-7<br>CCJ09448.1 Pcoc_GH28-8<br>CCJ09449.1 Pcoc_GH28-9                                                         | -    | -   | -    | -    | AGK45631.1<br>AGK45632.1 |
| <i>Gastrophysa atrocyanea</i>          | -    | -                                                                                                | -                                                                                                                                                                                  | BAE94320.1 Gatr_GH48-1<br>BAE94321.1 Gatr_GH48-2                           | -                                                                                                                                                                                                                                                                                              | -    | -   | -    | -    | -                        |
| <i>Callosobruchus maculatus</i>        | None | ADU33271.1 Cmac_GH5-1<br>ADU33272.1 Cmac_GH5-2<br>ADU33273.1 Cmac_GH5-3<br>ADU33274.1 Cmac_GH5-4 | None                                                                                                                                                                               | None                                                                       | ADU33264.1 Cmac_GH28-1<br>ADU33265.1 Cmac_GH28-2<br>ADU33266.1 Cmac_GH28-3<br>ADU33267.1 Cmac_GH28-4<br>ADU33268.1 Cmac_GH28-5<br>ADU33269.1 Cmac_GH28-6<br>ADU33270.1 Cmac_GH28-7                                                                                                             | -    | -   | -    | -    | -                        |
| <i>Apriona germari</i>                 | -    | AAX18655.1 Ager_GH5                                                                              | AAU44973.1 Ager_GH45-1<br>AAR22385.1 Ager_GH45-2                                                                                                                                   | -                                                                          | -                                                                                                                                                                                                                                                                                              | -    | -   | -    | -    | -                        |
| <i>Psacotheta hilaris</i>              | -    | BAB86867.1 Phil_GH5                                                                              | -                                                                                                                                                                                  | -                                                                          | -                                                                                                                                                                                                                                                                                              | -    | -   | -    | -    | -                        |
| <i>Anoplophora chinensis</i>           | -    | AFN89566.1 Achi_GH5                                                                              | AFN89565.1 Achi_GH45                                                                                                                                                               | -                                                                          | -                                                                                                                                                                                                                                                                                              | -    | -   | -    | -    | -                        |
| <i>Oncideres albomarginata chamela</i> | -    | ADI24131.1 Oalb_GH5                                                                              | ADI24132.1 Oalb_GH45                                                                                                                                                               | -                                                                          | -                                                                                                                                                                                                                                                                                              | -    | -   | -    | -    | -                        |

| [Curculionoidea]               |                |                                                |                                                                                                                                                                                                                                        |                                                                                                                                                          |                                                                                                                                                          |                                                                                                                                                                                                                                                                                                                                                                                                                                                                                                                      |                                                                    |                                                                                                                                                                                                                                                                        |                                                                                                                                          |                                           |   |
|--------------------------------|----------------|------------------------------------------------|----------------------------------------------------------------------------------------------------------------------------------------------------------------------------------------------------------------------------------------|----------------------------------------------------------------------------------------------------------------------------------------------------------|----------------------------------------------------------------------------------------------------------------------------------------------------------|----------------------------------------------------------------------------------------------------------------------------------------------------------------------------------------------------------------------------------------------------------------------------------------------------------------------------------------------------------------------------------------------------------------------------------------------------------------------------------------------------------------------|--------------------------------------------------------------------|------------------------------------------------------------------------------------------------------------------------------------------------------------------------------------------------------------------------------------------------------------------------|------------------------------------------------------------------------------------------------------------------------------------------|-------------------------------------------|---|
| <i>Dendroctonus ponderosae</i> | None           | None                                           | ADU33287.1 Dpon_GH45-1<br>ADU33288.1 Dpon_GH45-2<br>ADU33289.1 Dpon_GH45-3<br>ADU33290.1 Dpon_GH45-4<br>ADU33291.1 Dpon_GH45-5<br>ADU33292.1 Dpon_GH45-6<br>ADU33293.1 Dpon_GH45-7<br>ADU33294.1 Dpon_GH45-8<br>ADU33295.1 Dpon_GH45-9 | ADU33296.1 Dpon_GH48_1<br>ADU33297.1 Dpon_GH48_2<br>ADU33298.1 Dpon_GH48_3<br>ADU33299.1 Dpon_GH48_4<br>ADU33300.1 Dpon_GH48_5<br>ADU33301.1 Dpon_GH48_6 |                                                                                                                                                          | ADU33302.1 Dpon_GH28-1<br>ADU33303.1 Dpon_GH28-2<br>ADU33304.1 Dpon_GH28-3<br>ADU33305.1 Dpon_GH28-4<br>ADU33306.1 Dpon_GH28-5<br>ADU33307.1 Dpon_GH28-6<br>ADU33308.1 Dpon_GH28-7<br>ADU33309.1 Dpon_GH28-8<br>ADU33310.1 Dpon_GH28-9<br>ADU33311.1 Dpon_GH28-10<br>ADU33312.1 Dpon_GH28-11<br>ADU33313.1 Dpon_GH28-12<br>ADU33314.1 Dpon_GH28-13<br>ADU33315.1 Dpon_GH28-14<br>ADU33316.1 Dpon_GH28-15<br>ADU33317.1 Dpon_GH28-16<br>ADU33318.1 Dpon_GH28-17<br>ADU33319.1 Dpon_GH28-18<br>ADU33320.1 Dpon_GH28-19 | ENN78831.1<br>ENN78830.1<br>ENN83076.1<br>ENN83093.1<br>ENN72429.1 | AEE63189.1<br>AEE62454.1<br>AEE61591.1<br>AEE63265.1<br>ERL86564.1<br>AEE62108.1<br>AEE61793.1<br>AEE62242.1<br>ERL84361.1<br>ERL83310.1<br>ERL83693.1<br>ERL84272.1<br>ERL91732.1<br>ENN80860.1<br>AEE62089.1<br>AEE62876.1<br>ENN74637.1<br>ENN73453.1<br>AEE61395.1 | ERL94909.1<br>ERL94908.1<br>ENN82337.1<br>ENN79930.1<br>ERL90588.1<br>ENN75533.1<br>ENN75708.1<br>ERL87701.1<br>ENN77102.1<br>ERL92906.1 | XP_970010.1<br>ENN70227.1                 | - |
| <i>Ips pini</i>                | -              | None                                           | CB408544 Ipin_GH45_1                                                                                                                                                                                                                   | -                                                                                                                                                        | -                                                                                                                                                        | -                                                                                                                                                                                                                                                                                                                                                                                                                                                                                                                    | -                                                                  | -                                                                                                                                                                                                                                                                      | -                                                                                                                                        | -                                         | - |
| <i>Hypothenemus hampei</i>     | -              | ACU52526.1 Hham_GH5-1<br>ACU52527.1 Hham_GH5-2 | -                                                                                                                                                                                                                                      | -                                                                                                                                                        | -                                                                                                                                                        | -                                                                                                                                                                                                                                                                                                                                                                                                                                                                                                                    | -                                                                  | -                                                                                                                                                                                                                                                                      | -                                                                                                                                        | -                                         | - |
| <i>Sitophilus oryzae</i>       | None           | None                                           | ADU33246.1 Sory_GH45-1<br>ADU33247.1 Sory_GH45-2<br>ADU33248.1 Sory_GH45-3<br>ADU33249.1 Sory_GH45-4<br>ADU33250.1 Sory_GH45-5                                                                                                         | ADU33251.1 Sory_GH48_1<br>ADU33252.1 Sory_GH48_2                                                                                                         | ADU33253.1 Sory_GH28-1<br>ADU33254.1 Sory_GH28-2<br>ADU33255.1 Sory_GH28-3<br>ADU33256.1 Sory_GH28-4<br>ADU33257.1 Sory_GH28-5<br>ADU33258.1 Sory_GH28-6 | -                                                                                                                                                                                                                                                                                                                                                                                                                                                                                                                    | -                                                                  | -                                                                                                                                                                                                                                                                      | -                                                                                                                                        | -                                         |   |
| <i>Otiorhynchus sulcatus</i>   | -              | -                                              | -                                                                                                                                                                                                                                      | CAH25542.1 Osul_GH48                                                                                                                                     | -                                                                                                                                                        | -                                                                                                                                                                                                                                                                                                                                                                                                                                                                                                                    | -                                                                  | -                                                                                                                                                                                                                                                                      | -                                                                                                                                        | -                                         |   |
| [Tenebrionoidea]               |                |                                                |                                                                                                                                                                                                                                        |                                                                                                                                                          |                                                                                                                                                          |                                                                                                                                                                                                                                                                                                                                                                                                                                                                                                                      |                                                                    |                                                                                                                                                                                                                                                                        |                                                                                                                                          |                                           |   |
| <i>Tribolium castaneum</i>     | XP_001810693.1 | None                                           | None                                                                                                                                                                                                                                   | None                                                                                                                                                     | None                                                                                                                                                     | None                                                                                                                                                                                                                                                                                                                                                                                                                                                                                                                 | XP_970010.1                                                        | XP_975666<br>XP_975665<br>XP_972437<br>XP_972082<br>XP_972032<br>XP_972134<br>XP_968318<br>XP_970224.1<br>XP_972386.1<br>EFA06171.1<br>XP_972182.1<br>XP_972285.1<br>XP_966332.1<br>XP_972231.1<br>XP_972342.1                                                         | XP_967022.2<br>XP_967103.1<br>XP_968811.2<br>XP_968738.2<br>XP_968946.1<br>XP_969694.1<br>EFA02566.1                                     | XP_973404.1<br>XP_973339.2<br>XP_973373.1 | - |
| [Diptera]                      |                |                                                |                                                                                                                                                                                                                                        |                                                                                                                                                          |                                                                                                                                                          |                                                                                                                                                                                                                                                                                                                                                                                                                                                                                                                      |                                                                    |                                                                                                                                                                                                                                                                        |                                                                                                                                          |                                           |   |
| <i>Drosophila melanogaster</i> | None           | None                                           | None*                                                                                                                                                                                                                                  | None                                                                                                                                                     | None*                                                                                                                                                    | -                                                                                                                                                                                                                                                                                                                                                                                                                                                                                                                    | -                                                                  | NP_648918<br>NP_652145.1<br>NP_651391.1                                                                                                                                                                                                                                | NP_611119.1<br>NP_609354.1                                                                                                               | -                                         |   |

**NOTE:**

For each sequence, its accession number (NCBI) and the ID used in this study is listed. For GH families that were not included in our study '-' is shown.

\*In Calderón-Cortés *et al.* [12], *Drosophila melanogaster* is shown to have two GH45 (EC068056 and CO334668) and one GH28 (CO335003). The nucleotide sequences of these two GH45s are 100% identical, and there are only three nucleotide differences between these *D. melanogaster* GH45s and *L. decemlineata* GH45-7 (ADU33351.1) (100% identical in amino acid sequences). The *D. melanogaster* GH28 and *L. decemlineata* GH28-9 (ADU33363.1) are also 100% identical at the nucleotide level. Furthermore, BLAST similarity search against the *D. melanogaster* genome (ver. 5.51; <http://flybase.org>) failed to find any similar sequences. Therefore, we concluded that these are likely misidentifications. GH45 and GH28 are absent in *D. melanogaster*.

\*\*Pauchet *et al.* [22] showed ten GH28 genes (ADU33355.1-ADU33364.1) in *L. decemlineata*. However, we found one more GH28 gene (AEX93414.1, Ldec\_GH28-11) in the NCBI NR database.
